# Supplementary material
Source: PubMed Central journal article supplement (PMC3674067)
Supplement: cc-12-1395-s01.pdf [file cc-12-1395-s01.pdf]

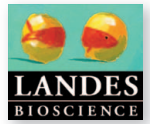

## **Supplemental Material to:**

**Arianna Giacobbe, Lucilla Bongiorno-Borbone, Alessandro Terrinoni, Francesca Bernassola, Elke Katrin Markert, Arnold J. Levine, Zhaohui Fen, Massimiliano Agostini, Lello Zolla, Alessandro Finazzi Agrò, Daniel Notterman, Gerry Melino and Angelo Peschiaroli**

**p63 regulates glutaminase 2 expression**

**2013; 12(9)**

**<http://dx.doi.org/10.4161/cc.24478>**

**<http://www.landesbioscience.com/journals/cc/article/24478>**

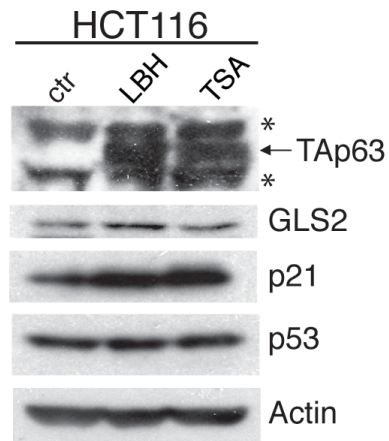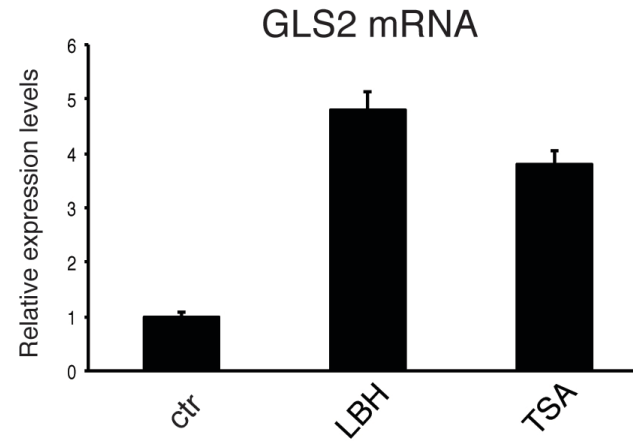

**Supplementary Figure 1.**

**HDAC inhibitors regulate GLS2 expression in HCT116 cells.** HCT116 cells were treated with TSA (1  $\mu$ M) or LBH589 (2  $\mu$ M) for eighteen hours and whole cell extracts were analyzed by IB using antibodies to the indicated proteins (left panels). In parallel total RNA was extracted and GLS2 expression was analyzed by qRTR-PCR (right panels).

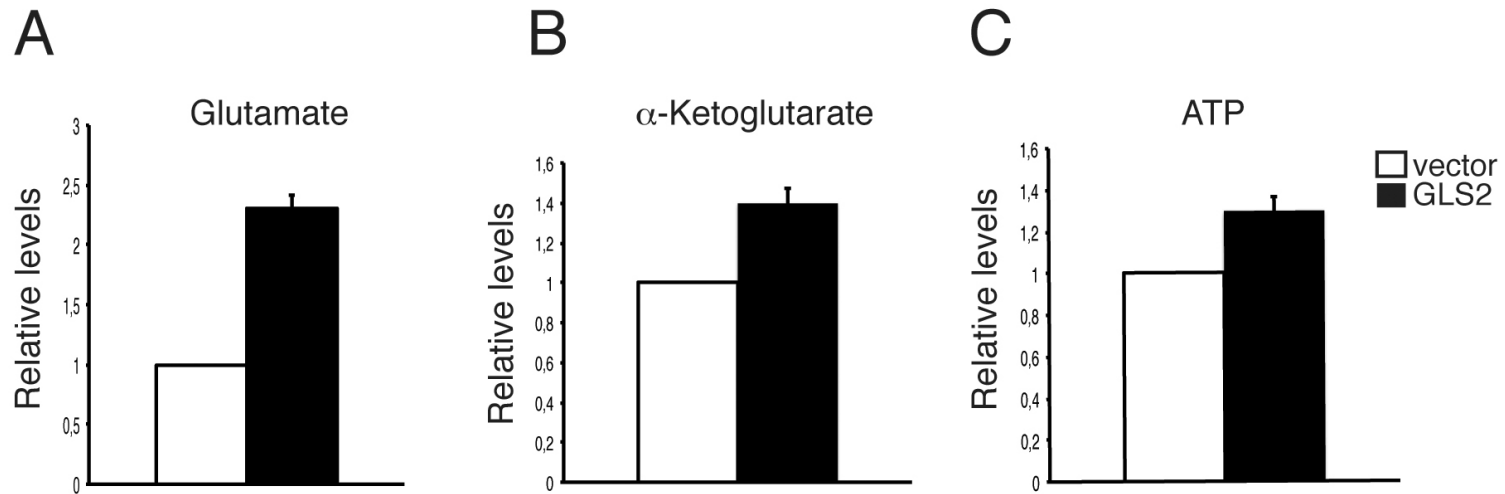

**Supplementary Figure 2.**

**GLS2 expression increases glutamate,  $\alpha$ -Ketoglutarate and ATP levels.** H1299 cells were transfected with a vectors encoding human GLS2 and after 48 hours the indicated cellular metabolites were quantified as described in Material and Methods. Representative results are shown (mean  $\pm$  s.d. n=3).

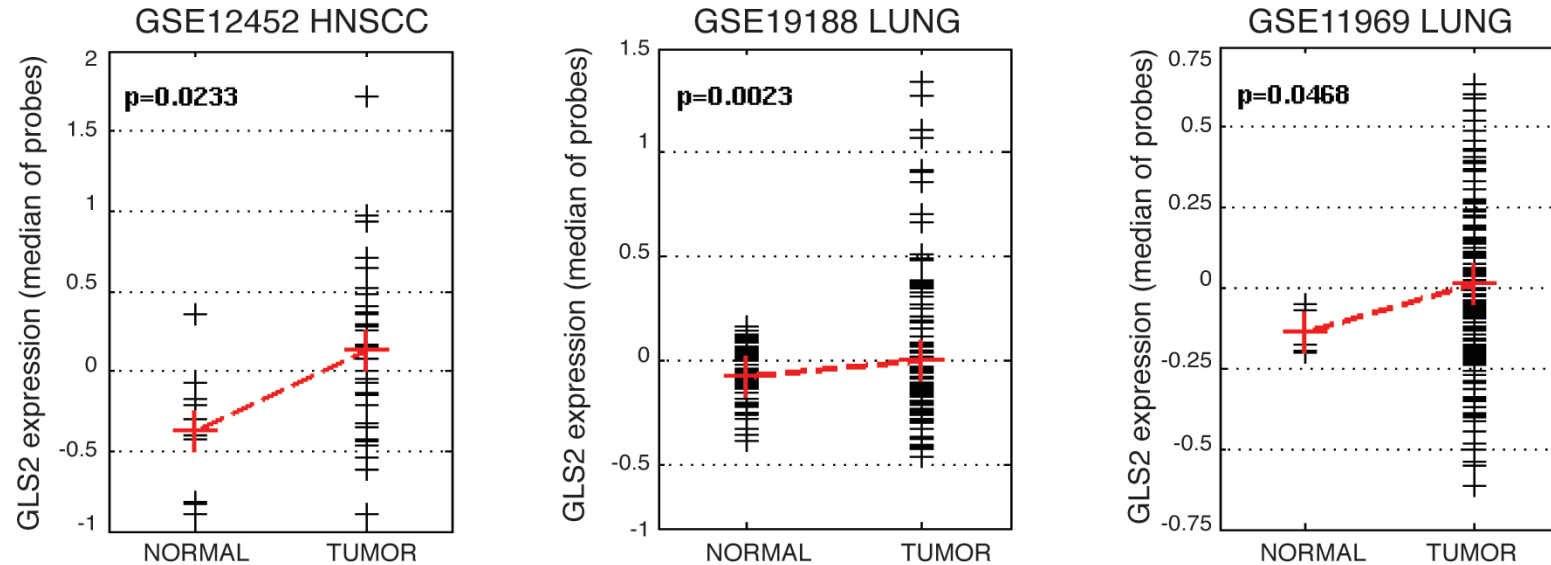

### Supplementary Figure 3

**GLS2 expression is up-regulated in lung and HNSCC tumors samples.** Box and whisker plots of GLS2 expression in nasopharyngeal tumor samples dataset (GSE12452) and in two lung cancers dataset (GSE19188 and GSE11969). GLS2 expression value was compared between normal and tumors samples. See Materials and Methods for details of data analysis.
